# Adulis and the transshipment of baboons during classical antiquity

Franziska Grathwol<sup>1</sup>, Christian Roos<sup>2</sup>, Dietmar Zinner<sup>3,4,5</sup>, Benjamin Hume<sup>1,6</sup>, Stéphanie M. Porcier<sup>7</sup>, Didier Berthet<sup>8</sup>, Jacques Cuisin<sup>9</sup>, Stefan Merker<sup>10</sup>, Claudio Ottoni<sup>11</sup>, Wim Van Neer<sup>12,13</sup>, Nathaniel J. Dominy<sup>14,15</sup>, Gisela H. Kopp<sup>1,15,16,17,\*</sup>

<sup>1</sup> Department of Biology, University of Konstanz, Konstanz, Germany

<sup>2</sup> Gene Bank of Primates and Primate Genetics Laboratory, Deutsches Primatenzentrum, Leibniz Institute for Primate Research, Göttingen, Germany

<sup>3</sup> Cognitive Ethology Laboratory, Deutsches Primatenzentrum, Leibniz Institute for Primate Research, Göttingen, Germany

<sup>4</sup> Department of Primate Cognition, Georg-August-University of Göttingen, Göttingen, Germany

<sup>5</sup> Leibniz-ScienceCampus Primate Cognition, Göttingen, Germany

<sup>6</sup> SequAna – Sequencing Analysis Core Facility, University of Konstanz, Konstanz, Germany

<sup>7</sup> Laboratoire CNRS ASM << Archéologie des Sociétés Méditerranéennes (UMR 5140), Université Paul-Valéry, LabEx Archimède, Montpellier, France.

<sup>8</sup> Musée des Confluences, Lyon, France

<sup>9</sup> Muséum National d'Histoire Naturelle, Paris, France

<sup>10</sup> Department of Zoology, State Museum of Natural History Stuttgart, Germany

<sup>11</sup> Department of Biology, University of Rome Tor Vergata, Rome, Italy

<sup>12</sup> Royal Belgian Institute of Natural Sciences, Brussels, Belgium

<sup>13</sup> Department of Biology, KU Leuven, Leuven, Belgium

<sup>14</sup> Departments of Anthropology and Biological Sciences, Dartmouth College, Hanover, USA

<sup>15</sup> Zukunftskolleg, University of Konstanz, Konstanz, Germany

<sup>16</sup> Department of Migration, Max Planck Institute of Animal Behavior, Konstanz, Germany

<sup>17</sup> Centre for the Advanced Study of Collective Behaviour, University of Konstanz, Konstanz, Germany

\* Corresponding author: [gisela.kopp@uni-konstanz.de](mailto:gisela.kopp@uni-konstanz.de)

## Abstract

Adulis, located on the Red Sea coast in present-day Eritrea, was a bustling trading centre between the first and seventh centuries CE. Several classical geographers—Agatharchides of Cnidus, Pliny the Elder, Strabo—noted the value of Adulis to Greco-Roman Egypt, particularly as an emporium for living animals, including baboons (*Papio* spp.). Though fragmentary, these accounts predict the Adulite origins of mummified baboons in Ptolemaic catacombs, while inviting questions on the geoprovenance of older (Late Period) baboons recovered from Gabbanat el-Qurud (“Valley of the Monkeys”), Egypt. Dated to ca. 800–540 BCE, these animals could extend the antiquity of Egyptian-Adulite trade by as much as five centuries. To explore this possibility, we analysed complete mitochondrial genomes from a mummified baboon from Gabbanat el-Qurud and 14 museum specimens with known provenance together with published georeferenced mitochondrial sequence data. Phylogenetic assignment connects the mummified baboon to modern populations of *Papio hamadryas* in Eritrea and eastern Sudan. This result, assuming geographical stability of phylogenetic clades, suggests that present-day Eritrea, and by extension Adulis, was a source of baboons for Late Period Egyptians. It also establishes geographic continuity with baboons from the fabled Land of Punt (Dominy et al., 2020), giving weight to speculation that Punt and Adulis were essentially the same trading centres separated by a thousand years of history.

## Key words

*Papio*; ancient DNA; ancient trade routes; phylogeography; mitochondrial genome; museomics; capture enrichment

## Introduction

Adulis, on the coast of present-day Eritrea, was an important hub during the rise of cross-ocean maritime trade, connecting ships, cargoes, and ideas from Egypt, Arabia, and India (Burstein, 2002; Munro-Hay, 1982; Seland, 2008). Trade peaked between the fourth and seventh centuries CE, propelling the rise and expansion of the Aksumite kingdom, but its occupation history extends, at minimum, to the first millennium BCE (Zazzaro et al., 2014). Corroborating this archaeological record are written accounts that draw attention to the importance of Adulis as one of the foremost sources of African animals or animal products during the Hellenistic period (323–31 BCE). In *Topographia Christiana*, a sixth-century text, the Nestorian merchant Cosmas Indicopleustes recounts his own visit to Adulis in 518 CE (Fauvelle-Aymar, 2010; Hatke, 2013). There he copied the text of a stele inscribed in Ge'ez and Greek, and known today as the *Monumentum Adulitanum I*. The text celebrates the military conquests of Ptolemy III Euergetes [reign: 246–222 BCE] and notes the local availability of war elephants for himself and his predecessor, Ptolemy II Philadelphus [reign: 284–246 BCE] (Bowersock, 2013).

Echoing this account is the first-century *Periplus Maris Erythraei*, an anonymous text focused on maritime trade across the Red Sea Basin: “practically the whole number of elephants and rhinoceros that are killed live in the places inland, although at rare intervals they are hunted on the seacoast even near Adulis” (Casson, 1989, 1993). Pliny the Elder described Adulis as a thriving emporium in his *Naturalis Historia*, another first-century text, and commented on the availability of ivory, rhinoceros horn, hippopotamus hides, tortoise shell, and *sphingia*—or ‘sphinx monkeys,’ a term that probably refers to the gelada, *Theropithecus gelada* (Jolly & Ucko, 1969). Pliny’s account relied heavily on the writings of Agatharchides of Cnidus (ca. 145 BCE), who described ‘Aithiopia’ (meaning the Red Sea coast and African hinterlands) as a source of sphinx monkeys, *cepi* (probably patas monkeys, *Erythrocebus patas* (Burstein, 1989)), and *cynocephali*—or ‘dog-heads’. Strabo’s *Geographica* references the worship of *cynocephali* at Hermopolis (Egypt), making it clear that the animal in question is the hamadryas baboon (*Papio hamadryas*), the traditional sacred animal of the Egyptian god Thoth (Figure 1). The source of baboons in ancient Egypt is an enduring question (Dominy et al., 2020), as the current distribution of baboons excludes Egypt (Figure 2) and there is no prehistoric evidence of baboons occurring in Egypt naturally (Geraads, 1987).

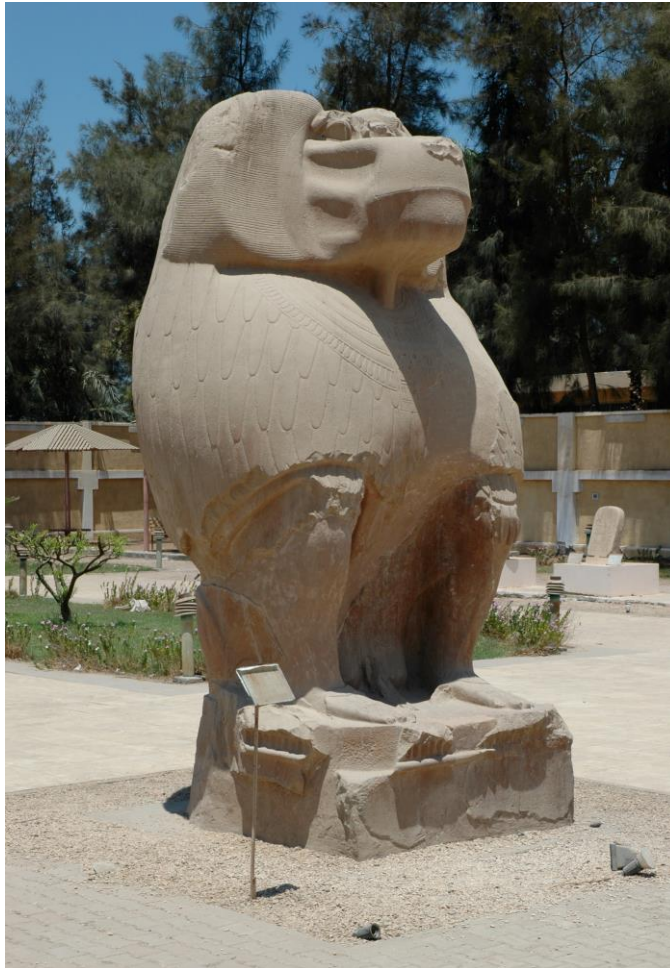

**Figure 1.** Strabo's reference (17.1.40) to the worship of cynocephali at Hermopolis Magna makes clear that the animal in question is the hamadryas baboon (*Papio hamadryas*). The sanctuary and temple complex featured several 35-ton statues of *P. hamadryas* as the embodiment of Thoth. One of the oldest deities in the Egyptian pantheon, Thoth is best known as a god of writing and wisdom, a lunar deity, and vizier of the gods, but also as a cosmic deity, creator god, and warrior (Stadler, 2012). The quartzite statues were erected by Amenhotep III, 18th Dynasty, New Kingdom, 1390-1353 BCE. Photograph by N.J. Dominy.

Though fragmentary, the outlined historiography points to Adulis as a commercial source of mummified baboons in Ptolemaic catacombs, such as those at Saqqara and Tuna el-Gebel (Goudsmit & Brandon-Jones, 1999; Peters, 2020) [or those of their progenitors if Ptolemaic Egyptians maintained captive breeding programs (von den Driesch et al., 2004)]. At the same time, these accounts invite questions focused on the source of pre-Ptolemaic baboons recovered from Gabbanat el-Qurud, Egypt (Lortet & Gaillard, 1907) and dated to ca. 800–540 BCE (Richardin et al., 2017), a span that corresponds to the 25<sup>th</sup> Dynasty and Late Period of Egyptian antiquity. If these specimens can be traced to Eritrea, and by extension Adulis, then

they have the potential to extend the time depth of Egyptian-Adulite trade by as much as five centuries.

Mummified baboons have been investigated morphologically, revealing species-level taxonomic assignments as well as individual details, such as age, sex, and pathological condition (Boessneck, 1987; Brandon-Jones & Goudsmit, 2022; Goudsmit & Brandon-Jones, 1999, 2000; Peters, 2020). Such data are telling, but insufficient for determining fine-scale geographic origins. Recent oxygen and strontium stable isotope evidence suggest that mummified hamadryas baboons were imported from the region of northern Somalia, Eritrea and Ethiopia (Dominy et al., 2020). However, this method is not capable of pinpointing the geographic location of origin more precisely. It also fails at determining the geoprovenance of earlier generations bred in captivity, as shown for olive baboons from the Ptolemaic catacombs of North Saqqara (Dominy et al., 2020). The analysis of ancient DNA (aDNA) recovered from baboon mummies and compared to the current distribution of baboon genetic diversity has the potential to provide more detailed insights on the geographic origin of baboons in ancient Egypt. To explore this possibility, we sequenced the mitochondrial genome (mitogenome) of a mummified baboon to infer its geographic origin through phylogenetic assignment.

## **Materials and Methods**

In *Topography of Thebes*, Wilkinson (1853) noted a site called Gabbanat el-Qurud (“Valley of the Monkeys”) located ca. 2.5 km north-northwest of Medinet Habu, the mortuary temple of Ramses III. Intrigued by this observation, French Egyptologists Louis Lortet and Claude Gaillard sought and found the site in February 1905, along with the remains of mummified baboons. They recovered “seventeen skulls and a large quantity of bones,” which they attributed to *P. anubis* and *P. hamadryas* (Lortet & Gaillard, 1907, 1909). The assemblage includes juvenile and adult males and females buried in jars, sarcophagi, or wooden coffins. Now accessioned in the Musée des Confluences, Lyon, France, the linen wrapping of one mummified individual (MHNL 90001206) is dated radiometrically to 803 (95.4%) 544 cal. BC (Richardin et al., 2017).

Otoni et al. (2019) sampled dental calculus from 16 individuals in this assemblage and reported the preservation of ancient microbial DNA in a subset of six. Their success motivated us to extract DNA from the remaining tooth material of ten individuals (Table 1, Table S1). In addition, we obtained samples (skin, bone or tooth) from 21 modern historic specimens of baboons available in museum collections and representing the northeast African distribution



of the genus *Papio* (Table 1, Figure 2). These specimens were collected between 1855 and 1978 and we denote them “historic samples” in the remainder of the manuscript to distinguish them both from the older mummified specimens (“mummified samples”) and recently collected material (“modern samples”). Latitude-longitude information on the origin of the specimens was either derived from the respective museum database or assigned based on the listed provenance (Table 1).

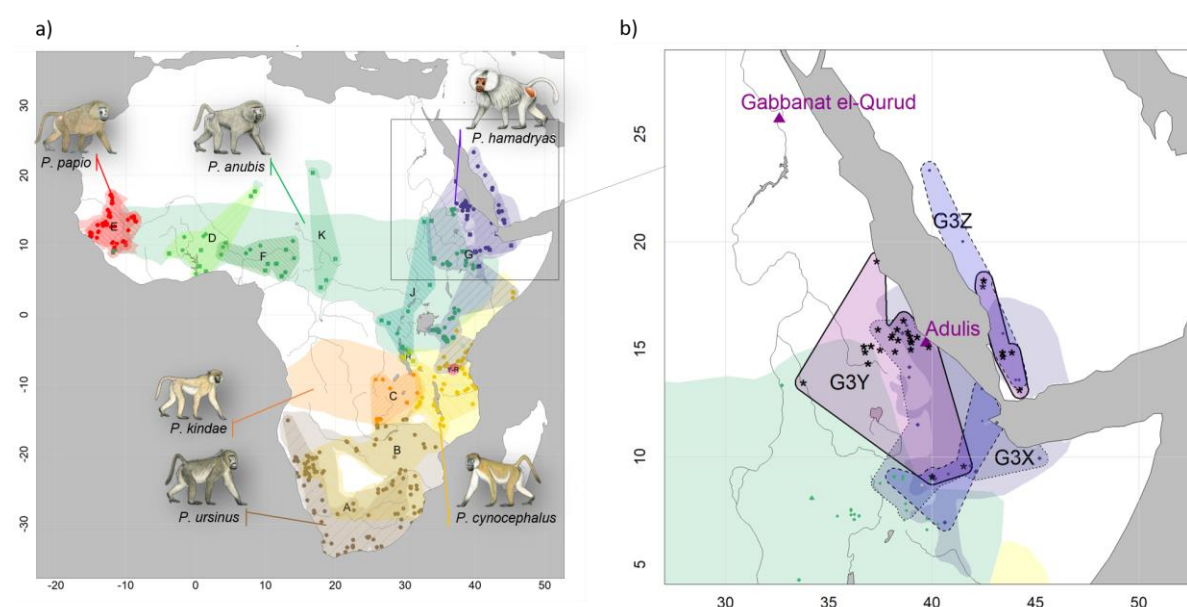

**Figure 2: Present-day distributions of the six baboon species, major mitochondrial clades, and provenance of samples analysed in this study.** a) Overview of species distributions according to the IUCN (2020) and coloured by species (red: *P. papio*, brown: *P. ursinus*, yellow: *P. cynocephalus*, orange: *P. kindae*, green: *P. anubis*, purple: *P. hamadryas*). Colour-patterned regions reflect main mitochondrial clade attribution resulting from phylogenetic reconstructions and are denoted with capital letters A-K (cf. Figure 3). Squares and circles represent geoprovenance of mitogenomes and partial mtDNA datasets (e.g. D-loop, cytochrome *b*), respectively, and are coloured by species. Note that introgressive hybridization has led to discordances between species assignment and mitochondrial clades. b) Close-up of the distribution of mitochondrial subclades G3-X, G3-Y, and G3-Z in the north-eastern distribution of baboons. Samples attributed to G3-Y, the subclade assigned to the mummified baboon in phylogenetic reconstructions and haplotype networks, are highlighted with asterisks. The locations of the excavation site of the mummified baboon, Gabbanat el-Qurud, and Adulis are marked with magenta triangles. Male baboon drawings by Stephen Nash, used with permission.

## DNA extraction and sequencing

DNA damage and degradation is expected from ancient (mummified) and 19<sup>th</sup>/early 20<sup>th</sup> century museum specimens. We therefore analysed mitochondrial DNA (mtDNA), which is available in higher copy numbers than nuclear DNA and holds greater potential for success

when sample quality is poor. We analysed complete mitogenomes because they are effective for reconstructing robust mitochondrial phylogenies of modern baboons and have proven to indicate the geographic origin of the corresponding sample reliably (Roos et al., 2021; Zinner et al., 2013). Recent advances in sequencing technologies allow the successful sequencing of mitogenomes either with a shotgun sequencing approach or, for samples with very low DNA quality and quantity, with a capture enrichment approach (Schuenemann et al., 2017; Shapiro & Hofreiter, 2013).

We extracted DNA with a specific column-based method aimed at the recovery of short DNA fragments following established protocols and necessary precautions for the analysis of aDNA (Dabney, Knapp, et al., 2013; Rohland et al., 2004; Roos et al., 2021). In particular, samples from mummified specimens were extracted separately and in a dedicated aDNA laboratory to prevent cross-contamination. Concentration of DNA extracts was measured on a Qubit fluorometer (Life Technologies, Singapore) and quality checked on a Bioanalyzer (Agilent, Santa Clara, US) or Tapestation 2200 (Agilent). All samples were initially sequenced with a shotgun approach. Samples with DNA extract concentrations below 4.5ng/μl or final mitogenome sequencing depth below 10X, and with enough remaining DNA extract, were enriched for mtDNA with a capture approach.

For the shotgun approach, sequencing libraries were prepared with the NEBNext Ultra II DNA Library Prep Kit (New England BioLabs, Frankfurt, Germany) according to the manufacturer's instructions without prior fragmentation. Library concentration and quality were assessed with the Qubit Fluorometer and Bioanalyzer and molarity was estimated via qPCR with the NEBNext Library Quant Kit (New England Biolabs). Libraries were single indexed with NEBNext Multiplex Oligos (New England Biolabs) with 5-11 PCR cycles and cleaned up with the kit's beads.

For the capture enrichment approach, RNA baits (myBaits custom Kit, Arbor Biosciences, Ann Arbor, USA) were designed for the mitogenome of *P. anubis* East (GenBank Acc. No. JX946196; (Zinner et al., 2013)). We prepared libraries with the Accel-NGS 1S Plus DNA Library Kit and the 1S Plus Dual Indexing Kit (Swift Biosciences, Ann Arbor, USA) according to the manufacturer's instructions for small fragment retention. Hybridization capture was performed with a 48h incubation step according to the manufacturer's instructions for highly degraded DNA. After library amplification with 14 PCR cycles, libraries were cleaned with SPRIselect beads (Beckmann Coulter, Krefeld, Germany).

Sequencing was performed with 24 libraries per lane (23 samples + pooled negative control to monitor contamination) on an Illumina HiSeq4000 (50bp, single-end read) at the NGS

Integrative Genomics core unit of the University Medical Center Göttingen, Göttingen, Germany, or on a NovaSeq6000 SP flow cell (100bp, paired-end read) at the Max Planck Institute for Molecular Genetics, Berlin, Germany. Capture enrichment libraries were reloaded and sequenced a second time to increase the number of reads.

# *Mitogenome assembly*

Raw sequencing reads were demultiplexed and adapters trimmed at the sequencing facilities. We performed subsequent sequence processing on the central high performance computing cluster bwForCluster BinAC. We checked read quality with FastQC 0.11.8 (Andrews, 2010), trimmed and filtered reads with Trimmomatic 0.39 (Bolger et al., 2014) using the settings ILLUMINACLIP:TruSeq3-PE.fa:2:30:10 MINLEN:30 SLIDINGWINDOW:4:20 LEADING:20 TRAILING:20, AVGQUAL:30, and confirmed adequate quality of trimmed reads again with FastQC. Reads were mapped with Burrows Wheeler Aligner (BWA) backtrack 0.7.17 (Li & Durbin, 2009) using default settings independently to each of seven different mitogenomes of representatives of the northern baboon clades (*P. anubis* East JX946196; *P. anubis* Gombe MG787545; *P. anubis* West1 JX946197; *P. anubis* West 2 JX946198; *P. cynocephalus* North JX946199; *P. hamadryas* JX946201; *P. papio* JX946203). We chose this approach to avoid biases in downstream analyses introduced through the choice of the reference genome and used the consensus sequence resulting from the best mapping results in downstream analyses. We did not adjust the settings as usually recommended to improve mapping results for aDNA (Schubert et al., 2012) but were stringent in mapping and filtering of reads to avoid the inclusion of nuclear mitochondrial DNA segments (NUMTs). Alignments were indexed with SAMtools 1.10 “index” and filtered with “view” for mapped and (in the case of paired-end data) properly paired reads with a mapping quality of at least MAPQ 30. Library complexity was estimated with the “EstimateLibraryComplexity” from the Picard Toolkit 2.20.4 (Broad Institute, 2019). We merged BAM files of the same samples with “MergeSamFiles” and removed duplicates with “MarkDuplicates” from the Picard Toolkit. DNA damage was estimated calculating the frequency of base substitutions, insertions and deletions at the 5’ and 3’ end, respectively, with DamageProfiler 1.0 (Neukamm et al., 2021). We calculated average sequencing depth with SAMtools 1.10 “depth” (Li et al., 2009) as the sum of reads covering each position divided by the number of bases in the reference genome, and estimated GC-bias with “CollectGCBiasMetrics” from the Picard Toolkit. We created a consensus sequence for each sample with the “doFasta” option in ANGSD (Korneliussen et al., 2014) using the base with the highest effective depth (EBD) and setting positions with coverage below 2 to



undetermined. We only retained mitogenomes for further analyses for which at least 80% of the sequence were covered at 3X.

We augmented our dataset with published mitogenomes of baboons (Roos et al., 2021) and *T. gelada* as outgroup (Table 1), and aligned sequences with MUSCLE 3.8.81 (Edgar, 2004) as implemented in the package msa 1.28.0 (Bodenhofer et al., 2015) in R 4.2.1 (R Core Team, 2022) using standard settings with a maximum number of 16 iterations.

For a more fine-scale geographic representation, we further included published sequence data from the north-eastern part of the baboon distribution of two different mitochondrial markers with differing resolution: the cytochrome *b* gene (*cyt b*) (Zinner et al., 2009, 2015), and a fragment of the hypervariable region I (HVRI) of the D-loop (Hapke et al., 2001; Kopp, Ferreira da Silva, et al., 2014; Kopp, Roos, et al., 2014; Städele et al., 2015; Winney et al., 2004). We extracted the corresponding regions from the mitogenome alignment and again removed sequences with more than 10% undetermined sites.

# *Phylogenetic reconstruction*

To identify the phylogenetic affiliation of the newly investigated samples, we reconstructed phylogenetic trees based on the final dataset of 46 mitogenomes (alignment length: 16,628bp) using Maximum Likelihood (ML) and Bayesian inference (BI) methods with W-IQ-Tree 1.6.12 (Nguyen et al., 2015; Trifinopoulos et al., 2016) and MrBayes 3.2.7 (Huelsenbeck & Ronquist, 2001; Ronquist & Huelsenbeck, 2003), respectively. We treated the mitogenome as a single partition, the optimal substitution model for phylogenetic reconstructions was detected to be TN+F+I+G4 (Tamura & Nei, 1993) under the Bayesian information criterion (BIC) and GTR+F+I+G4 (Tavaré, 1986) under the Corrected Akaike Information Criterion (AICc) with Modelfinder (Kalyaanamoorthy et al., 2017) as implemented in W-IQ-Tree. The ML tree was reconstructed with 10,000 ultrafast bootstrap replications (Hoang et al., 2018) applying the TN+F+I+G4 model. The BI tree was reconstructed applying the GTR+I+G model and using four independent Markov chain Monte Carlo (MCMC) runs with 1 million generations, a burn-in of 25% and sampling every 100 generations. To ensure convergence, the Potential Scale Reduction Factor (PSRF) was checked to be close to 1 for all parameters. We visualized phylogenetic trees with the R package ggtree 3.4.2 (Yu et al., 2017) and adopted clade nomination of (Roos et al., 2021) and (Kopp, Roos, et al., 2014).

## Haplotype networks

To determine the mitochondrial clade of origin of the analysed samples more precisely, we reconstructed median-joining haplotype networks (Bandelt et al., 1999) with Popart 1.7 (Leigh & Bryant, 2015) for both the HVRI (n=644, 176bp) and the cyt *b* (n=137, 1140bp) dataset.

## Geographic maps

Geographic maps were created in R. We obtained species distribution shapefiles from IUCN (Gippoliti, 2019; Sithaldeen, 2019; Wallis, 2020a, 2020b; Wallis et al., 2020; Wallis et al., 2021), river, lake and coastlines from Natural Earth (<https://www.naturalearthdata.com>) via rnaturalearth 0.1.0 (Massicotte & South, 2023).

## Results

### Mitogenomes from mummified and historic specimens

We discarded seven historic samples and nine mummified samples from our analysis due to insufficient DNA content, sequencing failure or low coverage and sequencing depth (Table S1). Thus, our results are based on the newly generated mitogenomes of 14 historic and one mummified individual (Table 1). In total, we obtained 896,025,770 raw sequence reads, with a mean of 34,462,530 ( $\pm$ SD 27,945,321) raw sequence reads per sample. On average 95.5% of reads survived trimming and a median of 9,934 (range: 244 – 2,722,354) reads per sample mapped to the reference genome. After removal of duplicates (duplication level median: 25.1%, range: 2.5 – 92.6%), a median of 7,398 (range: 237 – 497,458) mapped reads per sample resulted in the median final sequencing depth of 26X (range: 0.21 – 2952X). After exclusion of samples with low quality, the final dataset had a median final sequencing depth of 37X (range: 16 – 2952X), with a median of 0.4% undetermined sites (range: 0 – 1.7%) and a median breadth of coverage of at least 3X of 99.3% (range: 97.4 – 100%) (Table S1). All these metrics differed considerably depending on sample age (historic versus mummified) and DNA concentration (Figures S1 & S2). Capture enrichment strongly increased the number of mapped reads and final mean coverage as compared to the shotgun approach (Figures S1 & S2). GC-content of sequences was 40 - 50% (Figure S3), in the same range as the reference genomes.

The sequencing reads of the mummified sample (MHNL51000172) exhibit C to T and G to A misincorporations at 5' and 3' ends, reaching frequencies of 3.3% and 1.6% at the first/last position of the read (Figure S4).

### *Phylogenetic mapping*

Phylogenetic trees inferred from ML and BI revealed identical topologies with generally strong node support (100% Bootstrap support (BS) and posterior probability (PP) 1.0) and clearly defined geographic clades (Figures 3 & S5). These mitochondrial clades did not directly mirror species assignments. Within the north-eastern baboons, the central olive baboon clade J from Democratic Republic of the Congo, Tanzania, South Sudan and southern Sudan diverged first, followed by northern yellow baboons of clade G1 including a sample from Somalia. Hamadryas baboons formed clade G3, which also included olive baboons from the region. Clade G3 contained three subclades: Subclade G3-Z comprised hamadryas baboons from Ethiopia and Djibouti, subclade G3-X comprised hamadryas and olive baboons from Ethiopia, Eritrea, and Somalia, and subclade G3-Y comprised hamadryas and olive baboons from north-eastern Sudan and Eritrea. The mummified baboon from Gabbanat el-Qurud (MHNL 51000172) was located in subclade G3-Y, closest related to samples from Eritrea and north-eastern Sudan.

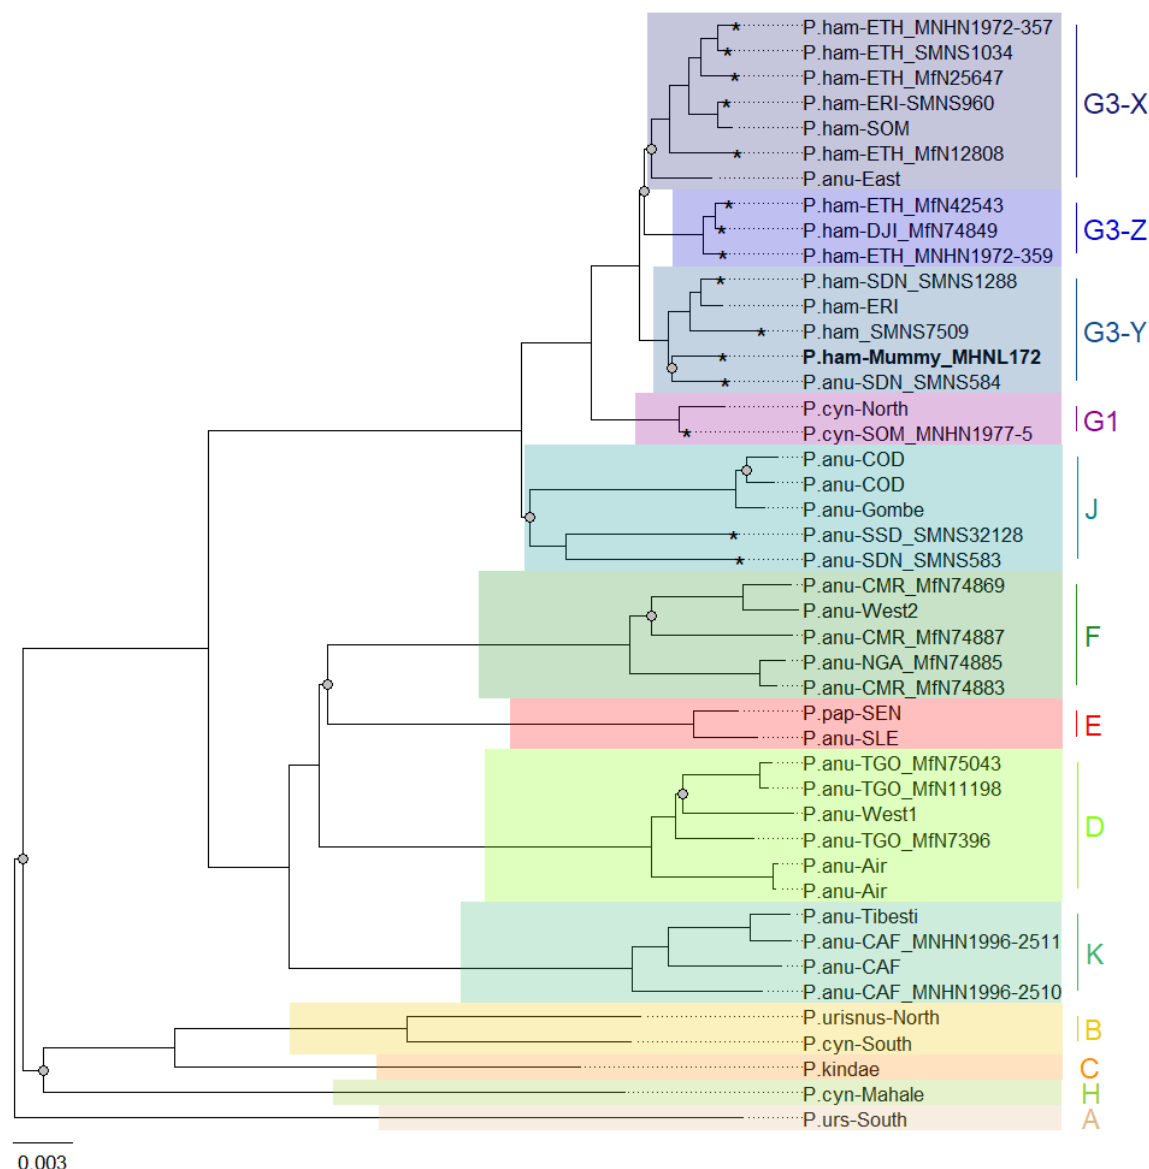

**Figure 3: Phylogeny of baboons based on complete mitochondrial genomes** as inferred from Maximum Likelihood analysis. *P. cynocephalus* from the Udzungwa Mountains and outgroup *T. gelada* were omitted from visualization for clarity. The analysed baboon mummy sample MHNL 51000172 (in bold) falls into clade G3-Y. Clade names (A-K) according to Roos et al. (2021), subclades X - Z according to Kopp et al. (2014); sample IDs include putative species (P.ham - *P. hamadryas*, P.anu - *P. anubis*, P.cyn - *P. cynocephalus*, P.urs - *P. ursinus*, P.pap - *P. papio*), country of origin code (CAF - Central African Republic, CMR - Cameroon, COD - Democratic Republic of Congo, DJI - Djibouti, ERI - Eritrea, ETH - Ethiopia, NGA - Nigeria, SDN - Sudan, SSD - South Sudan, SEN - Senegal, SLE - Sierra Leone, SOM - Somalia, TGO - Togo; note that sample SMNS7509 is of unclear geoprovenance) and abbreviated museum code. Nodes with a branch support below 95% are marked with a grey dot. Mitochondrial genomes generated in this study are marked with an asterisk.

The median-joining haplotype networks differentiated samples within clade G3 in greater detail and in a more precise geographic context (Figures 4 & S6). They revealed the same three subclades within the G3 clade. The HVRI and the *cyt b* networks were concordant both with each other and with the phylogenetic reconstructions in the attribution of samples to the different subclades, but exhibited slight discrepancies in the relation of clades to each other and the positioning of samples within the clades. Subclade G3-X contained hamadryas baboons from Ethiopia, Somalia, and Eritrea. Subclade G3-Z contained samples from Ethiopia, Somalia, Djibouti, from the southern tip of Eritrea and the Arabian Peninsula. Subclade G3-Y contained samples from Eritrea, eastern Sudan, the Arabian Peninsula and the mummified sample MHNL 51000172. Individuals closely related to this mummified baboon in the *cyt b* network were those from Sudan (on the Red Sea coast and in Senaar), Eritrea (between 14.3-16.0N 36.7-39.0E), and the Arabian Peninsula (Figure S6), and in the HVRI network samples from location “Bbr” (Barka Bridge, 15.6N 38.0E) in Eritrea (Figure 4).

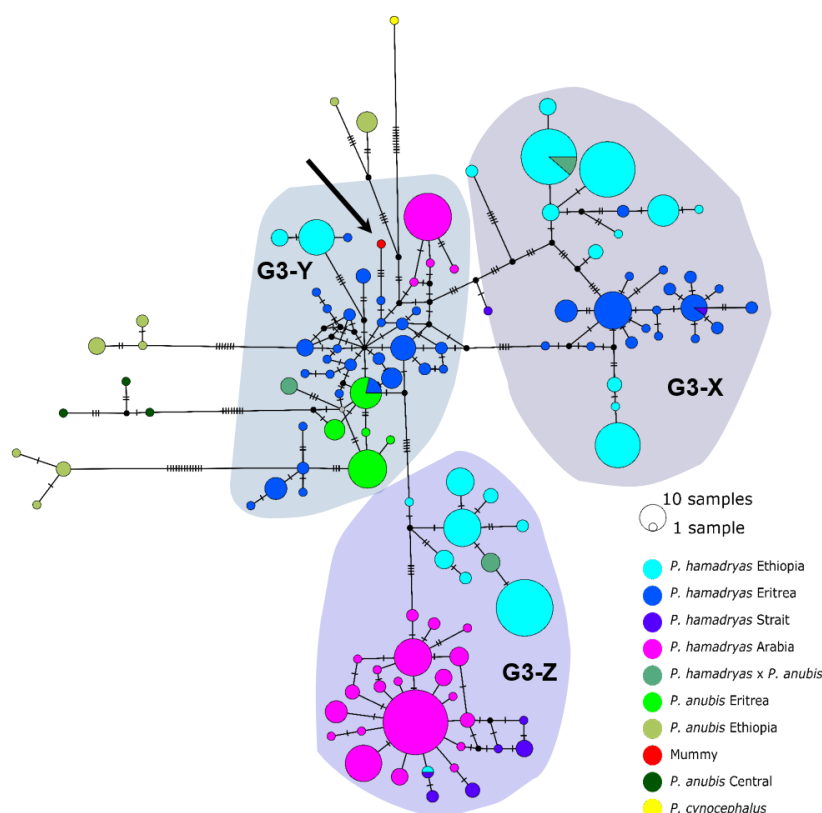

**Figure 4: Median joining haplotype network of north-eastern baboons** based on 644 D-loop sequences (176bp). The analysed baboon mummy sample resolves in clade G3-Y (depicted in red, black arrow). Circle colour reflects species and country of origin (“Arabia” comprises samples from Yemen and Saudi Arabia, “Strait” comprises samples from near the Bab-el-Mandab Strait, i.e. southern Eritrea, Djibouti, northern Somalia).



## Discussion

We succeeded in sequencing the mitogenomes of 14 modern historic baboons from north-eastern Africa and a mummified baboon recovered from Gabbanat el-Qurud, presenting the first genetic data of a mummified baboon from Ancient Egypt to date. DNA of the mummified baboon shows postmortem damage, which is, however, relatively low compared to what can be expected for samples of similar age (Dabney, Meyer, et al., 2013, Kistler et al., 2017). Low frequencies of post mortem damage were observed for aDNA from mummified specimens and have been attributed to the water deprivation during the mummification process, which may prevent hydrolytic deamination (Rossi et al., 2021). Postmortem damage observed here is within the range previously reported for aDNA derived from Egyptian human mummies (Schuenemann et al., 2017) and a Iranian saltmine sheep mummy (Rossi et al., 2021), which supports the authentic origin of our ancient sequence data and tends to rule out the possibility of contamination with modern DNA.

Our phylogenetic analysis of the newly generated mitogenomes in combination with published mitochondrial sequence data produced tree topologies in agreement with those of prior studies, with three well-supported clades across the north-eastern distribution of *Papio* (Roos et al., 2021). As previously described, introgressive hybridization has led to discordances between species assignment and mitochondrial clades (Rogers et al., 2019; Zinner et al., 2009, 2011). Our findings are notable for including specimens from previously unsampled and underrepresented regions, filling gaps in our knowledge of the distribution of mitochondrial clades. For instance, we report mitochondrial sequence data of baboons from regions previously uncovered, South Sudan and Sudan. We show that samples from South and southern Sudan, east of the White Nile, nest within the central olive baboon clade J, whereas samples from the coastal region of Sudan and east of the Blue Nile nest within the hamadryas clade G3. These findings expand the northern distributions of both clade J and clade G3 significantly, while also highlighting a strong geographic affinity between clade J and the Albertine Rift and (White) Nile Valley. Taxonomically, this clade corresponds with two subspecies recognized by Hill (Hill, 1970): *P. a. heuglini* and *P. a. tessellatum*.

A mummified hamadryas baboon from Gabbanat el-Qurud (MHNL 51000172) yielded sufficient aDNA to produce a complete mitogenome, which fell unequivocally in subclade G3-Y (cf. Kopp, Roos, et al., 2014). Haplotype networks allowed us to further refine subclade G3-Y, which consists of *P. hamadryas* and *P. anubis* samples from Eritrea and *P. anubis* samples from neighbouring regions in Sudan. G3-Y also includes samples from the southern-most distribution of *P. hamadryas* on the Arabian Peninsula. Geographic stability of phylogenetic clades over millennia has been shown for other baboon populations (Mathieson et al., 2020),

leading us to infer that MHNL 51000172 (or its maternal ancestor) originated in the region where clade G3-Y exists today. We cannot completely rule out an Arabian origin for MHNL 51000172, as our data does not cover the entire historic and present haplotype diversity there, but the tight clustering of the currently available Arabian sequences and distances in the HVRI network make an Arabian origin of MHNL 51000172 unlikely. Similarly, the close relationship with a sample of *P. anubis* from Sudan east of the Blue Nile (SMNS-Z-MAM-000584) could indicate trafficking of baboons along the Nile, as suggested for specimens of *P. anubis* recovered from Ptolemaic catacombs (Brandon-Jones & Goudsmit, 2022; Peters, 2020; von den Driesch et al., 2004) and the Predynastic site of Hierakonpolis (Van Neer et al., 2004). However, MHNL 51000172 was identified phenotypically as *P. hamadryas* (Lortet & Gaillard, 1907) and the distribution of hamadryas baboons is restricted to more eastern regions (Figure 2). If the distributions of baboons in north-eastern Africa have remained roughly stable within the last 2500 years (as supported by ecological niche modelling (Chala et al., 2019)), the region in Sudan east of the Blue Nile and west of the Atbarah River could not have served as a source region for hamadryas baboons. Thus, it stands to reason that MHNL 51000172 (or its maternal ancestor) was captured in present-day Eritrea (or close neighbouring regions) and trafficked to Egypt. The value of this finding is twofold. First, it connects the mummified baboon to populations that live today in Eritrea and eastern Sudan, between 13° and 20° latitude. Second, our findings corroborate the reports of Greco-Roman historians, who described Eritrea, and specifically Adulis as the sole source of *P. hamadryas* for Ptolemaic Egyptians.

Yet, this baboon predates the reign of Ptolemy I by centuries, presuming it is contemporaneous with other baboons in the same assemblage, ca. 800–540 BCE. Thus, our findings raise the possibility that Adulis already existed as a trading centre or entrepôt during the 25<sup>th</sup> and 26<sup>th</sup> dynasties of Egypt. Although speculative, and expressed with due caution, our reasoning would extend the antiquity of Egyptian–Adulite trade by as much as five centuries.

Arguing for pre-Ptolemaic contact between Egypt and Adulis is fraught in the absence of corroborating material evidence—but even so, the archaeological record is not entirely silent on the prospect. Manzo (2010) and others (Zazzaro et al., 2014) have re-assessed the ceramic tradition at Adulis and developed a chronology that stretches to the early second millennium BCE, the deepest levels of which contained a fragment of blue glass with yellow inlays similar to Egyptian glass from the New Kingdom (Fattovich, 2018). In Egypt, contact with the Eritrean lowlands is attested by trade goods dating to ca. 1800–1650 BCE or earlier, including potsherds, obsidian, and fragments of carbonized ebony (Fattovich, 2018; Lucarini et al., 2020). Discovered at Mersa Gewasis, a Middle Kingdom harbour for launching seafaring

expeditions to the fabled Land of Punt (Bard & Fattovich, 2018), these Eritrean objects offer tantalizing links between Punt and the prehistory of Adulis (Manzo, 2010, 2012).

Punt existed in a region south and east of Egypt, and was accessible by land or sea. For Egyptians, Punt was a source of 'marvels', particularly incense, but also baboons, that drove bidirectional trade for 1300 years (ca. 2500–1170 BCE) (Tallet, 2013). Some scholars have described this enterprise as the beginning of economic globalization (Fattovich, 2012), whereas others view it as the earliest maritime leg of the spice route (Keay, 2006), a trade network that would shape geopolitical fortunes for millennia. The global historical importance of Punt is therefore considerable, but there is a problem—its location is uncertain, in part because the toponym fades from view. From the early first millennium BCE, there are no further records of Egyptians in Punt, or of Puntites visiting Egypt. There are, however, two incomplete inscriptions that mention Punt in a narrative context, and both are attributed to the 26<sup>th</sup> (Saite) Dynasty (Betrò, 1996; Cavasin, 2019). One of these, the Defenneh stele, describes an expedition to Punt that was saved from dying thirst by unexpected rainfall on “the mountains of Punt” (Meeks, 2003). The Defenneh stele is a testament to the efforts of Saitic pharaohs to revive maritime commerce on the Red Sea (Lloyd, 1977), while also raising the possibility of renewed trade with Punt. It is perhaps no coincidence that the Saite dynasty (664-525 BCE) exists squarely within the radiometric date range of hamadryas baboons from Gabbanat el-Qurud.

Punt, like Adulis, was a source of baboons for Egyptians, a history that raises the possibility of using baboons as a tool for testing geographic hypotheses. Recently, Dominy et al. (2020) used stable isotope mapping methods to determine the geoprovenance of mummified baboons from Thebes (modern-day Luxor) and dated to the (late) New Kingdom. Their results pointed to present-day Ethiopia, Eritrea, or Djibouti, as well as portions of Somalia, an area that corroborates most scholarly views on the location of Punt (Breyer, 2016; Kitchen, 2004), but see (Meeks, 2002, 2003; Tallet, 2013). Here, we used aDNA to show that at least one baboon from the 25<sup>th</sup> Dynasty or Late Period of Egyptian history—a span that coincides with the last known use of the toponym Punt, but predates Greco-Roman accounts of Adulis as a source of baboons—can be traced to Eritrea. Thus, our findings appear to establish primatological continuity between Punt and Adulis. Such a conclusion must be viewed with caution, but it burnishes a longstanding current of conjecture among some historical archaeologists: that Punt and Adulis were essentially the same trading centre from different eras of Egyptian antiquity (Doresse, 1959; Fattovich, 2018; Kitchen, 2004; Massa, 2021; Phillips, 1997; Sleeswyk, 1983).

At minimum, our results reinforce the view that ancient Egyptian mariners travelled great distances to acquire living baboons. A great strength of this conclusion is that it is based on distinct but complementary methods, but of course, the sample size is paltry and limited to *P. hamadryas*, one of two baboon species recovered from Gabbanat el-Qurud. Moving forward, it would be desirable to expand the sample size, examine specimens of *P. anubis* as well as nuclear genomic data for increased precision, and include different time intervals of baboon mummification.

## **Future directions**

Direct radiocarbon dating of MHNL 51000172 and other baboons from Gabbanat el-Qurud is an urgent priority, in part because doing so would put these specimens into conversation with those from the catacombs of Tuna el-Gebel. The oldest gallery at Tuna el-Gebel, Gallery D, is dated to the 26<sup>th</sup> Dynasty and contains a single species of baboon: *P. anubis*. Von den Driesch and others (Peters, 2020; von den Driesch et al., 2004) have argued that these olive baboons, as well as *Chlorocebus aethiops* (also found in Gallery D), were sourced from the Sudanese Nile Valley and adjacent areas, which predicts membership in clade G3-Y, although clade J is also plausible. Construction of Gallery C began during the first period of Persian rule in Egypt (524-404 BCE) and continued through the 30<sup>th</sup> and Ptolemaic dynasties. As every phase of Gallery C contains mummified specimens of both *P. anubis* and *P. hamadryas*, there is rich opportunity to explore diachronic changes in trade routes using phylogeographic methods. Uniform membership in clade G3-Y, for example, would affirm that Late Period Egyptians were sourcing *P. hamadryas* from Eritrea as early as the sixth century BCE. Testing this hypothesis may prove rewarding.

## **Data access**

Raw sequencing data are deposited in the European Nucleotide Archive (ENA, project accession no. PRJEB60261), mitochondrial genomes on Genbank (accession numbers: OQ538075-OQ538089). Code used for data processing and analysis is available on OSF via <https://doi.org/10.17605/OSF.IO/D5GX3>.

## **Acknowledgements**

We thank Frieder Mayer and Christiane Funk from MfN Berlin for sharing baboon samples with us for genetic analyses. We thank Christiane Schwarz for assistance in DNA extraction and library preparation and Bernd Timmermann and Stefan Börno for advice and facilitation of sequencing. We are grateful to Salima Ikram and Julien Cooper for energizing discussion on the topics of Egyptian mummification and toponyms, and thank Laura Epp for advice on aDNA analyses. Research carried out on the mummies curated at the Musée des Confluences (Lyon, France) is supported by the SIMoS Program funded by LabEx ARCHIMEDE from "Investir L'Avenir" program ANR-11-LABX-0032-01 to SP. We acknowledge the Service des Musées de France, Mme Dominique Dupuis-Labbé and the Ministère de la Culture et de la Communication (France) for their ongoing support to the research carried out on the mummies. We acknowledge the support by the High Performance and Cloud Computing Group at the Zentrum für Datenverarbeitung of the University of Tübingen, the state of Baden-Württemberg through bwHPC and the German Research Foundation (DFG) through grant no INST 37/935- 1 FUGG. We acknowledge the University of Konstanz Sequencing Analysis (SequAna) Core Facility for bioinformatic assistance. This study was funded by the Young Scholar Fund and the Zukunftskolleg of the University of Konstanz (funded by the Federal Ministry of Education and Research (BMBF) and the Baden-Württemberg Ministry of Science as part of the Excellence Strategy of the German Federal and State Governments), and the Junge Akademie at the Berlin-Brandenburg Academy of Sciences and Humanities and the German National Academy of Sciences Leopoldina. NJD received support through the Senior Fellowship of the Zukunftskolleg, GHK is supported by the Hector Pioneer Fellowship of Hector Stiftung II and the Zukunftskolleg.

## **Author contributions**

GHK conceived the study and collected the samples together with FG. FG coordinated and conducted lab work, supported by GHK and CR. FG and GHK analysed the data and wrote the first draft of the manuscript, GHK and NJD wrote the second draft of the manuscript. BH advised on and reviewed bioinformatic analyses. DB, CO, SP and WVN provided mummy samples and context information. JC and SM provided museum specimens. CR and DZ contributed to discussion about the interpretation of the data and the outline of the paper. GHK and CR provided laboratory space, equipment, and reagents. All authors contributed to the final manuscript.



## References

- Andrews, S. (2010). *FastQC: A quality control tool for high throughput sequence data*. Babraham Bioinformatics. <https://www.bioinformatics.babraham.ac.uk/projects/fastqc/>
- Bandelt, H.-J., Forster, P., & Röhl, A. (1999). Median-joining networks for inferring intraspecific phylogenies. *Molecular Biology and Evolution*, 16(1), 37–48.
- Bard, K. A., & Fattovich, R. (2018). *Seafaring Expeditions to Punt in the Middle Kingdom: Excavations at Mersa/Wadi Gawasis, Egypt*. BRILL.
- Betrò, M. (1996). Punt, la XXVI dinastia e il frammento di statua del Museo Pushkin I.1.B 1025. *Egitto e Vicino Oriente*, 19, 41–49. <http://www.jstor.org/stable/24233303>
- Bodenhofer, U., Bonatesta, E., Horejš-Kainrath, C., & Hochreiter, S. (2015). msa: an R package for multiple sequence alignment. *Bioinformatics*, 31(24), 3997–3999. <https://doi.org/10.1093/bioinformatics/btv494>
- Boessneck, J. (1987). *Tuna el-Gebel I Die Tiergalerien*. Gerstenberg Verlag.
- Bolger, A. M., Lohse, M., & Usadel, B. (2014). Trimmomatic: a flexible trimmer for Illumina sequence data. *Bioinformatics*, 30(15), 2114–2120. <https://doi.org/10.1093/bioinformatics/btu170>
- Bowersock, G. W. (2013). *The Throne of Adulis: Red Sea Wars on the Eve of Islam*. OUP USA.
- Brandon-Jones, D., & Goudsmit, J. (2022). The nonhuman primate remains from the baboon catacomb at Saqqara in Egypt. In B. Urbani, D. Youlatos, & A. Antczak (Eds.), *World Archaeoprimatology. Interconnections of Humans and Nonhuman Primates in the Past* (pp. 311–353). Cambridge University Press, Cambridge, UK.
- Breyer, F. (2016). *Punt: Die Suche nach dem "Gottesland."* BRILL.
- Broad Institute. (2019). *Picard Toolkit*. <http://broadinstitute.github.io/picard/>
- Burstein, S. M. (1989). *On the Erythraean Sea*. Hakluyt Society London.
- Burstein, S. M. (2002). Kush, Axum and the ancient Indian Ocean trade. In T. A. Bács (Ed.), *A Tribute to Excellence: Studies Offered in Honor of Ernő Gaál, Ulrich Luft, and László Török* (pp. 127–137). Chaire d'Égyptologie de l'Université Eotvos Lorand.
- Casson, L. (1989). *The Periplus Maris Erythraei: Text with Introduction, Translation, and Commentary*. Princeton University Press.
- Casson, L. (1993). Ptolemy II and the Hunting of African Elephants. *Transactions and Proceedings of the American Philological Association. American Philological Association*, 123, 247–260. <https://doi.org/10.2307/284331>
- Cavasin, R. (2019). Tell Defenneh et la route de l'encens. *Égypte Nilotique et Méditerranéenne*, 12, 1–24
- Chala, D., Roos, C., Svenning, J.-C., & Zinner, D. (2019). Species-specific effects of climate change on the distribution of suitable baboon habitats - Ecological niche modeling of current and Last Glacial Maximum

conditions. *Journal of Human Evolution*, 132, 215–226. <https://doi.org/10.1016/j.jhevol.2019.05.003>

Dabney, J., Knapp, M., Glocke, I., Gansauge, M.-T., Weihmann, A., Nickel, B., Valdiosera, C., García, N., Pääbo, S., Arsuaga, J.-L., & Meyer, M. (2013). Complete mitochondrial genome sequence of a Middle Pleistocene cave bear reconstructed from ultrashort DNA fragments. *Proceedings of the National Academy of Sciences of the United States of America*, 110(39), 15758–15763. <https://doi.org/10.1073/pnas.1314445110>

Dabney, J., Meyer, M., & Pääbo, S. (2013). Ancient DNA damage. *Cold Spring Harbor Perspectives in Biology*, 5(7). <https://doi.org/10.1101/cshperspect.a012567>

Dominy, N. J., Ikram, S., Moritz, G. L., Wheatley, P. V., Christensen, J. N., Chipman, J. W., & Koch, P. L. (2020). Mummified baboons reveal the far reach of early Egyptian mariners. *eLife*, 9, e60860. <https://doi.org/10.7554/eLife.60860>

Doresse, J. (1959). *Ethiopia*. Elek Books.

Edgar, R. C. (2004). MUSCLE: multiple sequence alignment with high accuracy and high throughput. *Nucleic Acids Research*, 32(5), 1792–1797. <https://doi.org/10.1093/nar/gkh340>

Fattovich. (2012). Egypt's trade with Punt: New discoveries on the Red Sea coast. *British Museum Studies in Ancient Egypt and Sudan*.

Fattovich, R. (2018). The Archaeology of Punt. *The Journal of Egyptian Archaeology*, 104(2), 205–209. <https://doi.org/10.1177/0307513319858321>

Fauvelle-Aymar, F.-X. (2010). Les inscriptions d'Adoulis (Érythrée). Fragments d'un royaume d'influence hellénistique et gréco-romaine sur la côte africaine de la mer Rouge. *Bulletin de l'Institut Français D'archéologie Orientale - Tome 109*, 109.

Geraads, D. (1987). Dating the Northern African cercopithecoid fossil record. *Human Evolution*, 2(1), 19–27. <https://doi.org/10.1007/BF02436528>

Gippoliti, S. (2019). *Papio hamadryas* (e.T16019A17953082. Accessed on 23 August 2022.). The IUCN Red List of Threatened Species . <https://dx.doi.org/10.2305/IUCN.UK.2019-3.RLTS.T16019A17953082.en>

Goudsmit, J., & Brandon-Jones, D. (1999). Mummies of Olive Baboons and Barbary Macaques in the Baboon Catacomb of the Sacred Animal Necropolis at North Saqqara. *The Journal of Egyptian Archaeology*, 85, 45–53. <https://doi.org/10.2307/3822426>

Goudsmit, J., & Brandon-Jones, D. (2000). Evidence from the Baboon Catacomb in North Saqqara for a West Mediterranean Monkey Trade Route to Ptolemaic Alexandria. *The Journal of Egyptian Archaeology*, 86, 111–119. <https://doi.org/10.2307/3822311>

Hapke, A., Zinner, D., & Zischler, H. (2001). Mitochondrial DNA variation in Eritrean hamadryas baboons (*Papio hamadryas hamadryas*): life history influences population genetic structure. *Behavioral Ecology and Sociobiology*, 50, 483–492.

Hatke, G. (2013). *Aksum and Nubia: Warfare, Commerce, and Political Fictions in Ancient Northeast Africa*. NYU

574 Press.

575 Hill, W. C. O. (1970). *Primates: Comparative Anatomy and Taxonomy* (Vol. 8). Edinburgh University Press.

576 Hoang, D. T., Chernomor, O., von Haeseler, A., Minh, B. Q., & Vinh, L. S. (2018). UFBoot2: Improving the

577 Ultrafast Bootstrap Approximation. *Molecular Biology and Evolution*, 35(2), 518–522.

578 <https://doi.org/10.1093/molbev/msx281>

579 Huelsenbeck, J. P., & Ronquist, F. (2001). MRBAYES: Bayesian inference of phylogenetic trees. *Bioinformatics*,

580 17(8), 754–755. <https://www.ncbi.nlm.nih.gov/pubmed/11524383>

581 Jolly, C. J., & Ucko, P. J. (1969). The riddle of the sphinx-monkey. *Man in Africa*. London: Tavistock.

582 Kalyaanamoorthy, S., Minh, B. Q., Wong, T. K. F., von Haeseler, A., & Jermin, L. S. (2017). ModelFinder: fast

583 model selection for accurate phylogenetic estimates. *Nature Methods*, 14(6), 587–589.

584 <https://doi.org/10.1038/nmeth.4285>

585 Keay, J. (2006). *The Spice Route: a history*. University of California Press.

586 Kitchen. (2004). The elusive land of Punt revisited. In P. Lunde & P. A. (Eds.), *Trade and travel in the Red Sea*

587 *region* (pp. 25–31). Argentum Press.

588 Kopp, G. H., Ferreira da Silva, M. J., Fischer, J., Brito, J. C., Regnaut, S., Roos, C., & Zinner, D. (2014). The

589 Influence of Social Systems on Patterns of Mitochondrial DNA Variation in Baboons. *International Journal of*

590 *Primatology*, 35(1), 210–225. <https://doi.org/10.1007/s10764-013-9725-5>

591 Kopp, G. H., Roos, C., Butynski, T. M., Wildman, D. E., Alagaili, A. N., Groeneveld, L. F., & Zinner, D. (2014). Out

592 of Africa, but how and when? The case of hamadryas baboons (*Papio hamadryas*). *Journal of Human*

593 *Evolution*, 76, 154–164. <https://doi.org/10.1016/j.jhevol.2014.08.003>

594 Korneliussen, T. S., Albrechtsen, A., & Nielsen, R. (2014). ANGSD: Analysis of Next Generation Sequencing

595 Data. *BMC Bioinformatics*, 15, 356. <https://doi.org/10.1186/s12859-014-0356-4>

596 Leigh, J. W., & Bryant, D. (2015). popart : full-feature software for haplotype network construction. *Methods in*

597 *Ecology and Evolution / British Ecological Society*, 6(9), 1110–1116. [https://doi.org/10.1111/2041-](https://doi.org/10.1111/2041-210X.12410)

598 210X.12410

599 Li, H., & Durbin, R. (2009). Fast and accurate short read alignment with Burrows – Wheeler transform.

600 *Bioinformatics*, 25(14), 1754–1760. <https://doi.org/10.1093/bioinformatics/btp324>

601 Li, H., Handsaker, B., Wysoker, A., Fennell, T., Ruan, J., Homer, N., Marth, G., Abecasis, G., Durbin, R., & 1000

602 Genome Project Data Processing Subgroup. (2009). The Sequence Alignment/Map format and SAMtools.

603 *Bioinformatics*, 25(16), 2078–2079. <https://doi.org/10.1093/bioinformatics/btp352>

604 Lloyd, A. B. (1977). Necho and the Red Sea: Some Considerations. *The Journal of Egyptian Archaeology*, 63(1),

605 142–155. <https://doi.org/10.1177/030751337706300122>

606 Lortet, L. C. E., & Gaillard, C. (1907). La faune momifiée de l'ancienne Egypte (deuxième série). *Archives du*

607 *Muséum d'histoire naturelle de Lyon*, 9(1), 1–130. <https://doi.org/10.3406/mhnl.1907.961>

- 608 Lortet, L. C. E., & Gaillard, C. (1909). La faune momifiée de l'ancienne Egypte (troisième série). *Archives du*
- 609 *Muséum d'histoire naturelle de Lyon*, 10, 1–9.
- 610 Lucarini, G., Barca, D., & Manzo, A. (2020). The provenance of obsidian artefacts from the Middle Kingdom
- 611 harbour of Mersa/Wadi Gawasis, Egypt, and its implications for Red Sea trade routes in the 2nd millennium
- 612 BC. *Quaternary International: The Journal of the International Union for Quaternary Research*, 555, 85–95.
- 613 <https://doi.org/10.1016/j.quaint.2020.03.015>
- 614 Manzo, A. (2012). Nubians and the others on the Red Sea: An update on the exotic ceramic materials from the
- 615 Middle Kingdom harbour of Mersa/Wadi Gawasis, Red Sea, Egypt. In D. a. Agius, J. P. Cooper, A.
- 616 Trakadas, & C. Zazzaro (Eds.), *Navigated Spaces, Connected Places* (pp.47-58). Oxford: Archaeopress
- 617 Manzo, A. (2010). Adulis before Aksum? Possible 2nd and 1st millenium BC evidence from the site of the ancient
- 618 port. In G. Lusini (Ed.), *Current Trends in Eritrean Studies* (pp. 29–42). Università degli Studi di Napoli
- 619 “L’Orientale.”
- 620 Massa, S. (2021). Eritrean Mobility and Cultural Heritage. New Frontiers of the Horn of Africa. In S. Bortolotto &
- 621 F. Cheli (Eds.), *Eritrean heritage: ancient routes and settlements* (pp. 47–61). Altralinea Edizioni.
- 622 Mathieson, I., Abascal, F., Vinner, L., Skoglund, P., Pomilla, C., Mitchell, P., Arthur, C., Gurdasani, D., Willerslev,
- 623 E., Sandhu, M. S., & Dewar, G. (2020). An ancient baboon genome demonstrates long-term population
- 624 continuity in southern Africa. *Genome Biology and Evolution*. <https://doi.org/10.1093/gbe/evaa019>
- 625 Meeks, D. (2002). Coptos et le chemin de Pount. *Topoi Supplément 3, Actes Du Colloque « Autour de Coptos »*
- 626 *Organisé Au Musée Des Beaux-Arts de Lyon (17-18 Mars 2000)*, 267–334.
- 627 Meeks, D. (2003). Locating Punt. In D. O'Connor (Ed.), *Mysterious Lands* (pp. 53–80). UCL Press.
- 628 <https://doi.org/10.4324/9781843147626-4/locating-punt-dimitri-meeks>
- 629 Munro-Hay, S. (1982). The foreign trade of the Aksumite port of Adulis. *Azania: Archaeological Research in*
- 630 *Africa*, 17(1), 107–125. <https://doi.org/10.1080/00672708209511302>
- 631 Neukamm, J., Peltzer, A., & Nieselt, K. (2021). DamageProfiler: Fast damage pattern calculation for ancient
- 632 DNA. *Bioinformatics*, 37(20), 3652-3653. <https://doi.org/10.1093/bioinformatics/btab190>
- 633 Nguyen, L.-T., Schmidt, H. A., von Haeseler, A., & Minh, B. Q. (2015). IQ-TREE: a fast and effective stochastic
- 634 algorithm for estimating maximum-likelihood phylogenies. *Molecular Biology and Evolution*, 32(1), 268–274.
- 635 <https://doi.org/10.1093/molbev/msu300>
- 636 Ottoni, C., Guellil, M., Ozga, A. T., Stone, A. C., Kersten, O., Bramanti, B., Porcier, S., & Van Neer, W. (2019).
- 637 Metagenomic analysis of dental calculus in ancient Egyptian baboons. *Scientific Reports*, 9(1), 19637.
- 638 <https://doi.org/10.1038/s41598-019-56074-x>
- 639 Peters, J. (2020). The allochthonous fauna of Tuna el-Gebel and its cultural implications. In M. C. Flossmann-
- 640 Schütze, F. Hoffmann, & S. A. (Eds.), *Tuna el-Gebel — Eine Ferne Welt: Tagungsband zur Konferenz der*
- 641 *Graduate School “Distant Worlds” vom 16. bis 19.1.2014 in München* (pp. 253–267). Vaterstetten: Patrick

Brose.

Phillips, J. (1997). Punt and Aksum: Egypt and the Horn of Africa. *Journal of African History*, 38, 423–457.

R Core Team. (2022). *R: A Language and Environment for Statistical Computing*. R Foundation for Statistical Computing. <https://www.R-project.org/>

Richardin, P., Porcier, S., Ikram, S., Louarn, G., & Berthet, D. (2017). Cats, Crocodiles, Cattle, and More: Initial Steps Toward Establishing a Chronology of Ancient Egyptian Animal Mummies. *Radiocarbon*, 59(2), 595–607. <https://doi.org/10.1017/RDC.2016.102>

Rogers, J., Raveendran, M., Harris, R. A., Mailund, T., Leppälä, K., Athanasiadis, G., Schierup, M. H., Cheng, J., Munch, K., Walker, J. A., Konkel, M. K., Jordan, V., Steely, C. J., Beckstrom, T. O., Bergey, C., Burrell, A., Schrempf, D., Noll, A., Kothe, M., ... Baboon Genome Analysis Consortium. (2019). The comparative genomics and complex population history of *Papio* baboons. *Science Advances*, 5, eaau6947.

Rohland, N., Siedel, H., & Hofreiter, M. (2004). Nondestructive DNA extraction method for mitochondrial DNA analyses of museum specimens. *BioTechniques*, 36(5), 814–816, 818–821. <https://doi.org/10.2144/04365ST05>

Ronquist, F., & Huelsenbeck, J. P. (2003). MrBayes 3: Bayesian phylogenetic inference under mixed models. *Bioinformatics*, 19(12), 1572–1574. <https://doi.org/10.1093/bioinformatics/btg180>

Roos, C., Knauf, S., Chuma, I. S., Maille, A., Callou, C., Sabin, R., Portela Miguez, R., & Zinner, D. (2021). New mitogenomic lineages in *Papio* baboons and their phylogeographic implications. *American Journal of Physical Anthropology*, 174(3), 407–417. <https://doi.org/10.1002/ajpa.24186>

Rossi, C., Ruß-Popa, G., Mattiangeli, V., McDaid, F., Hare, A. J., Davoudi, H., Laleh, H., Lorzadeh, Z., Khazaeli, R., Fathi, H., Teasdale, M. D., A'ali, A., Stöllner, T., Mashkour, M., & Daly, K. G. (2021). Exceptional ancient DNA preservation and fibre remains of a Sasanian saltmine sheep mummy in Chehrābād, Iran. *Biology Letters*, 17(7), 20210222. <https://doi.org/10.1098/rsbl.2021.0222>

Schubert, M., Ginolhac, A., Lindgreen, S., Thompson, J. F., Al-Rasheid, K. A. S., Willerslev, E., Krogh, A., & Orlando, L. (2012). Improving ancient DNA read mapping against modern reference genomes. *BMC Genomics*, 13, 178. <https://doi.org/10.1186/1471-2164-13-178>

Schuenemann, V. J., Peltzer, A., Welte, B., van Pelt, W. P., Molak, M., Wang, C.-C., Furtwängler, A., Urban, C., Reiter, E., Nieselt, K., Teßmann, B., Francken, M., Harvati, K., Haak, W., Schiffels, S., & Krause, J. (2017). Ancient Egyptian mummy genomes suggest an increase of Sub-Saharan African ancestry in post-Roman periods. *Nature Communications*, 8, 15694. <https://doi.org/10.1038/ncomms15694>

Seland, E. H. (2008). The Indian ocean and the globalisation of the ancient world. *Ancient West & East*, 7(0), 67–79. <https://doi.org/10.2143/awe.7.0.2033253>

Shapiro, B., & Hofreiter, M. (2013). *Ancient DNA* (pp. 475–481). Springer.

Sithaldeen, R. (2019). *Papio ursinus* (e.T16022A168568698 Accessed on 23 August 2022.). The IUCN Red List



of Threatened Species. <https://dx.doi.org/10.2305/IUCN.UK.2019-3.RLTS.T16022A168568698.en>

Sleeswyk, A. W. (1983). On the location of the land of Pwnt on two Renaissance maps. *International Journal of Nautical Archaeology*, 12.4, 279-291.

Massicotte, P., & South, A. (2023). rnatuarearth: world map data from Natural Earth. R package version 0.1.0. . <https://docs.ropensci.org/rnatuarearth/https://github.com/ropensci/rnatuarearth>.

Stådele, V., van Doren, V., Pines, M., Swedell, L., & Vigilant, L. (2015). Fine-scale genetic assessment of sex-specific dispersal patterns in a multilevel primate society. *Journal of Human Evolution*, 78, 103–113.

Stadler, M. A. (2012). Thoth. *UCLA Encyclopedia of Egyptology*, 1(1).

Tallet, P. (2013). Deux notes sur les expéditions au pays de Pount à la lumière de nouvelles données archéologiques [PL. X-XI – PL. COUL. 13-15]. *Revue d'Égyptologie*, 64(0), 189–209.

Tamura, K., & Nei, M. (1993). Estimation of the number of nucleotide substitutions in the control region of mitochondrial DNA in humans and chimpanzees. *Molecular Biology and Evolution*, 10(3), 512–526. <https://doi.org/10.1093/oxfordjournals.molbev.a040023>

Tavaré, S. (1986). Some probabilistic and statistical problems in the analysis of DNA sequences. *Lectures on Mathematics in the Life Sciences*, 17(2), 57–86.

Trifinopoulos, J., Nguyen, L.-T., von Haeseler, A., & Minh, B. Q. (2016). W-IQ-TREE: a fast online phylogenetic tool for maximum likelihood analysis. *Nucleic Acids Research*, 44(W1), W232–W235. <https://doi.org/10.1093/nar/gkw256>

Van Neer, W., Linseele, V., & Friedman, R. F. (2004). Animal burials and food offerings at the Elite Cemetery HK6 of Hierakonpolis. In S. Hendrickx, R. F. Friedman, K. M. Cialowicz, & M. Chlodnicki (Eds.), *Egypt at its Origins. Studies in Memory of Barbara Adams (Proceedings of the International Conference “Origin of the State. Predynastic and Early Dynastic Egypt”, Krakow, 28th August - 1st September 2002.)* (Vol. 1, pp. 67–130).

von den Driesch, A., Kessler, D., & Peters, J. (2004). Mummified baboons and other primates from the Saitic-Ptolemaic animal necropolis of Tuna El-Gebel, Middle Egypt. In G. Grupe & J. Peters (Eds.), *Documenta Archaeobiologiae 2: Conservation policy and current research* (pp. 231–278). Rahden: Verlag Marie Leidorf.

Wallis, J. (2020a). *Papio anubis* (e.T40647A17953200 Accessed on 23 August 2022.). The IUCN Red List of Threatened Species. <https://dx.doi.org/10.2305/IUCN.UK.2020-2.RLTS.T40647A17953200.en>

Wallis, J. (2020b). *Papio cynocephalus* (Version e.T92250442A92251260 Accessed on 23 August 2022). The IUCN Red List of Threatened Species. <https://dx.doi.org/10.2305/IUCN.UK.2020-2.RLTS.T92250442A92251260.en>

Wallis, J., Alonso, C., da Silva M. J., B. C. B. J. F., Hernansaiz A Kopp G, Vale, C., & Zinner, D. (2020). *Papio papio*. *The IUCN Red List of Threatened Species* (No. e.T16018A17952926). IUCN. <https://doi.org/10.2305/IUCN.UK.2020-2.RLTS.T16018A17952926.en>

- Wallis, J., Petersdorf, M., Weyher, A.H. & Jolly, C.J. (2021). *Papio kindae* (e.T136848A190319676. Accessed on 23 August 2022.). The IUCN Red List of Threatened Species. <https://dx.doi.org/10.2305/IUCN.UK.2021-1.RLTS.T136848A190319676.en>.
- Wilkinson, J. G. (1853). *Topography of Thebes, and General View of Egypt: Being a Short Account of the Principal Objects Worthy of Notice in the Valley of the Nile*. Murray. <https://doi.org/10.11588/diglit.1035>
- Winney, B. J., Hammond, R. L., Macasero, W., Flores, B., Boug, A., Biquand, V., Biquand, S., & Bruford, M. W. (2004). Crossing the Red Sea: phylogeography of the hamadryas baboon, *Papio hamadryas hamadryas*. *Molecular Ecology*, 13(9), 2819–2827. <https://doi.org/10.1111/j.1365-294X.2004.02288.x>
- Yu, G., Smith, D. K., Zhu, H., Guan, Y., & Lam, T. T. Y. (2017). GGTREE: an R package for visualization and annotation of phylogenetic trees with their covariates and other associated data. *Methods in Ecology and Evolution*, 8(1), 28–36. <https://doi.org/10.1111/2041-210X.12628>
- Zazzaro, C., Cocca, E., & Manzo, A. (2014). Towards a Chronology of the Eritrean Red Sea Port of Adulis (1<sup>ST</sup> - Early 7<sup>TH</sup> Century AD). *Journal of African Archaeology*, 12(1), 43–73. <http://www.jstor.org/stable/43135623>
- Zinner, D., Buba, U., & Roos, C. (2011). Pan-African voyagers: The phylogeography of baboons. In V. Sommer & C. Roos (Eds.), *Primates of Gashaka. Socioecology and Conservation in Nigeria's Biodiversity Hotspot* (pp. 267–307). Springer.
- Zinner, D., Groeneveld, L. F., Keller, C., & Roos, C. (2009). Mitochondrial phylogeography of baboons (*Papio* spp.) - Indication for introgressive hybridization? *BMC Evolutionary Biology*, 9, 83. <https://doi.org/10.1186/1471-2148-9-83>
- Zinner, D., Keller, C., Nyahongo, J. W., Butynski, T. M., de Jong, Y. A., Pozzi, L., Knauf, S., Liedigk, R., & Roos, C. (2015). Distribution of Mitochondrial Clades and Morphotypes of Baboons *Papio* spp. (Primates: Cercopithecidae) in Eastern Africa. *Journal of East African Natural History*, 104(1-2), 143–168. <https://doi.org/10.2982/028.104.0111>
- Zinner, D., Wertheimer, J., Liedigk, R., Groeneveld, L. F., & Roos, C. (2013). Baboon phylogeny as inferred from complete mitochondrial genomes. *American Journal of Physical Anthropology*, 150, 133–140. <https://doi.org/10.1002/ajpa.22185>

**Table 1:** Information on samples analysed in this study

| Taxon                       | Origin | Museum ID            | Country | Latitude | Longitude | MitoClade | AccNo    | Reference           |
|-----------------------------|--------|----------------------|---------|----------|-----------|-----------|----------|---------------------|
| <i>P. hamadryas</i>         | MNHN   | MO-1972-357          | ETH     | 9.320    | 42.119    | G3-X      | OQ538080 | this study          |
| <i>P. hamadryas</i>         | SMNS   | SMNS-Z-MAM-001034*   | ETH     | 11.500   | 39.300    | G3-X      | OQ538076 | this study          |
| <i>P. hamadryas</i>         | MfN    | ZMB Mam_025647 (2)   | ETH     | 14.164   | 38.891    | G3-X      | OQ538079 | this study          |
| <i>P. hamadryas</i>         | SMNS   | SMNS-Z-MAM-000960    | ERI     | 15.783   | 38.453    | G3-X      | OQ538078 | this study          |
| <i>P. hamadryas</i>         | NHMUK  | ZD.1910.10.3.1       | SOM     | 9.933    | 45.200    | G3-X      | MT279063 | Roos et al. 2020    |
| <i>P. hamadryas</i>         | MfN    | ZMB Mam_012808       | ETH     | 9.314    | 42.118    | G3-X      | OQ538089 | this study          |
| <i>P. anubis</i>            | Wild   |                      | ETH     | 8.968    | 38.571    | G3-X      | JX946196 | Zinner et al. 2013  |
| <i>P. hamadryas</i>         | MfN    | ZMB Mam_042543 (1)   | ETH     | 9.593    | 41.866    | G3-Z      | OQ538084 | this study          |
| <i>P. hamadryas</i>         | MfN    | ZMB Mam_074849       | DJI     | 11.589   | 43.129    | G3-Z      | OQ538085 | this study          |
| <i>P. hamadryas</i>         | MNHN   | MO-1972-359          | ETH     | 6.998    | 40.478    | G3-Z      | OQ538086 | this study          |
| <i>P. hamadryas</i>         | SMNS   | SMNS-Z-MAM-001288    | SDN     | 19.110   | 37.327    | G3-Y      | OQ538081 | this study          |
| <i>P. hamadryas</i>         | Wild   |                      | ERI     | 15.011   | 38.971    | G3-Y      | JX946201 | Zinner et al. 2013  |
| <i>P. hamadryas</i>         | SMNS   | SMNS-Z-MAM-007509**  | -       | -        | -         | G3-Y      | OQ538082 | this study          |
| <i>P. hamadryas</i>         | MHNL   | 51000172             | EGY     | -        | -         | G3-Y      | OQ538083 | this study          |
| <i>P. anubis</i>            | SMNS   | SMNS-Z-MAM-000584*** | SDN     | 13.460   | 33.780    | G3-Y      | OQ538075 | this study          |
| <i>P. cynocephalus</i>      | Wild   |                      | TNZ     | -7.347   | 37.165    | G1        | JX946199 | Zinner et al. 2013  |
| <i>P. cynocephalus</i>      | MNHN   | ZM-MO-1977-5         | SOM     | 3.243    | 45.471    | G1        | OQ538088 | this study          |
| <i>P. anubis</i>            | NHMUK  | ZD1929.4.27.2        | COD     | -0.800   | 26.633    | J         | MT279061 | Roos et al. 2020    |
| <i>P. anubis</i>            | NHMUK  | ZD1929.4.27.1        | COD     | -1.183   | 27.650    | J         | MT279062 | Roos et al. 2020    |
| <i>P. anubis</i>            | Wild   | 19GNM2220916         | TNZ     | -4.679   | 29.621    | J         | MG787545 | Roos et al. 2018    |
| <i>P. anubis</i>            | SMNS   | SMNS-Z-MAM-032128    | SSD     | 4.281    | 33.555    | J         | OQ538087 | this study          |
| <i>P. anubis</i>            | SMNS   | SMNS-Z-MAM-000583    | SDN     | 13.333   | 32.729    | J         | OQ538077 | this study          |
| <i>P. anubis</i>            | MfN    | ZMB Mam_074869       | CMR     | 5.533    | 12.317    | F         | OQ538071 | Kopp et al. in prep |
| <i>P. anubis</i>            | Wild   |                      | NGA     | 7.317    | 11.583    | F         | JX946198 | Zinner et al. 2013  |
| <i>P. anubis</i>            | MfN    | ZMB Mam_074887       | CMR     | 9.328    | 12.946    | F         | OQ538069 | Kopp et al. in prep |
| <i>P. anubis</i>            | MfN    | ZMB Mam_074885       | NGA     | 7.298    | 10.318    | F         | OQ538064 | Kopp et al. in prep |
| <i>P. anubis</i>            | MfN    | ZMB Mam_074883       | CMR     | 6.334    | 9.961     | F         | OQ538072 | Kopp et al. in prep |
| <i>P. papio</i>             | Wild   |                      | SEN     | 12.883   | -12.767   | E         | JX946203 | Zinner et al. 2013  |
| <i>P. anubis</i>            | NHMUK  | ZD.1947.586          | SLE     | 8.917    | -11.817   | E         | MT279064 | Roos et al. 2020    |
| <i>P. anubis</i>            | MfN    | ZMB Mam_075043       | TGO     | 9.260    | 0.781     | D         | OQ538066 | Kopp et al. in prep |
| <i>P. anubis</i>            | MfN    | ZMB Mam_011198       | TGO     | 6.228    | 1.478     | D         | OQ538067 | Kopp et al. in prep |
| <i>P. anubis</i>            | Wild   |                      | CIV     | 8.800    | -3.790    | D         | JX946197 | Zinner et al. 2013  |
| <i>P. anubis</i>            | MfN    | ZMB Mam_007396 (1)   | TGO     | 6.950    | 0.585     | D         | OQ538065 | Kopp et al. in prep |
| <i>P. anubis</i>            | NHMUK  | ZD.1939.1022         | NER     | 17.000   | 7.933     | D         | MT279065 | Roos et al. 2020    |
| <i>P. anubis</i>            | NHMUK  | ZD.1939.1020         | NER     | 17.683   | 8.483     | D         | MT279066 | Roos et al. 2020    |
| <i>P. anubis</i>            | MNHN   | ZM-MO-1960-476       | TCO     | 20.344   | 16.786    | K         | MT279067 | Roos et al. 2020    |
| <i>P. anubis</i>            | MNHN   | MO-1996-2511         | CAF     | 3.905    | 17.922    | K         | OQ538068 | Kopp et al. in prep |
| <i>P. anubis</i>            | NHMUK  | ZD.1907.7.8.11       | CAF     | 8.000    | 20.000    | K         | MT279068 | Roos et al. 2020    |
| <i>P. anubis</i>            | MNHN   | MO-1996-2510         | CAF     | 4.966    | 18.701    | K         | OQ538070 | Kopp et al. in prep |
| <i>P. ursinus</i>           | Wild   |                      | ZAF     | -24.680  | 30.790    | B         | JX946205 | Zinner et al. 2013  |
| <i>P. cynocephalus</i>      | Wild   |                      | TNZ     | -11.261  | 37.514    | B         | JX946200 | Zinner et al. 2013  |
| <i>P. kindae</i>            |        |                      | ZMB     | -12.591  | 30.252    | C         | JX946202 | Zinner et al. 2013  |
| <i>P. cynocephalus</i>      | Wild   | 04MNM1300916         | TNZ     | 6.119    | 29.730    | H         | MT279069 | Roos et al. 2020    |
| <i>P. ursinus</i>           | Wild   |                      | ZAF     | -34.456  | 20.407    | A         | JX946204 | Zinner et al. 2013  |
| <i>P. cynocephalus</i>      | Wild   | 24UNF1150317         | TNZ     | 7.815    | 36.895    |           | MT279060 | Roos et al. 2020    |
| <i>Theropithecus gelada</i> |        |                      |         |          |           |           | FJ785426 | Hodgson et al. 2009 |

Abbreviations: AccNo, GenBank accession number; NHMUK, Natural History Museum, London; MNHN, Muséum National d'Histoire Naturelle, Paris; MfN, Museum für Naturkunde, Berlin; SMNS, State Museum of Natural History Stuttgart; MdC, Musée des Confluences, Lyon.

\*mislabelled in museum records as *T. gelada*

\*\*unclear provenance "Somaliland" (not equal to present-day Somaliland)

\*\*\*misidentified provenance "Abyssinia" as Ethiopia in museum records

xxx: AccNo will be added upon acceptance of manuscript

# **Supplement**

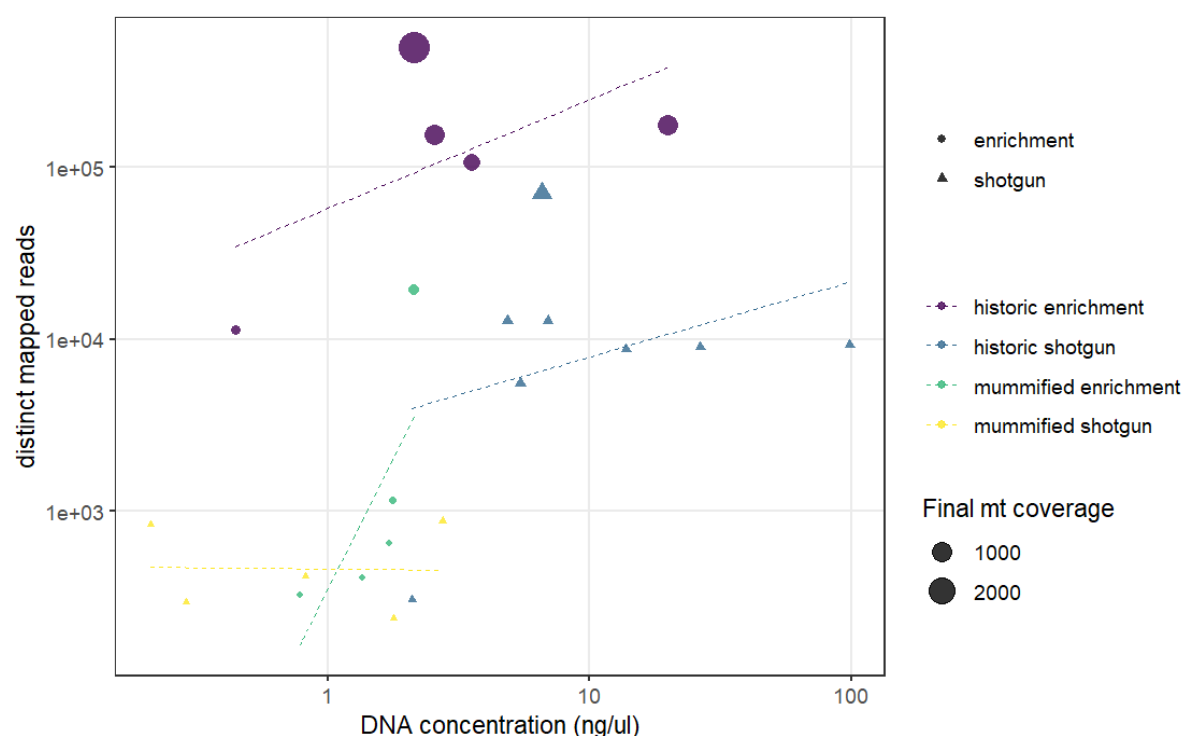

**Figure S1:** Comparison of DNA concentration and amount of distinct mapped reads. A higher DNA concentration produces a higher number of distinct mapped reads. Capture enrichment additionally increases the number of distinct mapped reads. Circles and triangles depict the different sequencing approaches, enrichment and shotgun, respectively; size is related to the final coverage of the mitogenome; colours represent the different sample types and sequencing approaches (yellow: shotgun sequencing of mummy sample, blue: shotgun sequencing of historic sample, purple: capture enrichment of historic sample, green: capture enrichment of mummy sample).

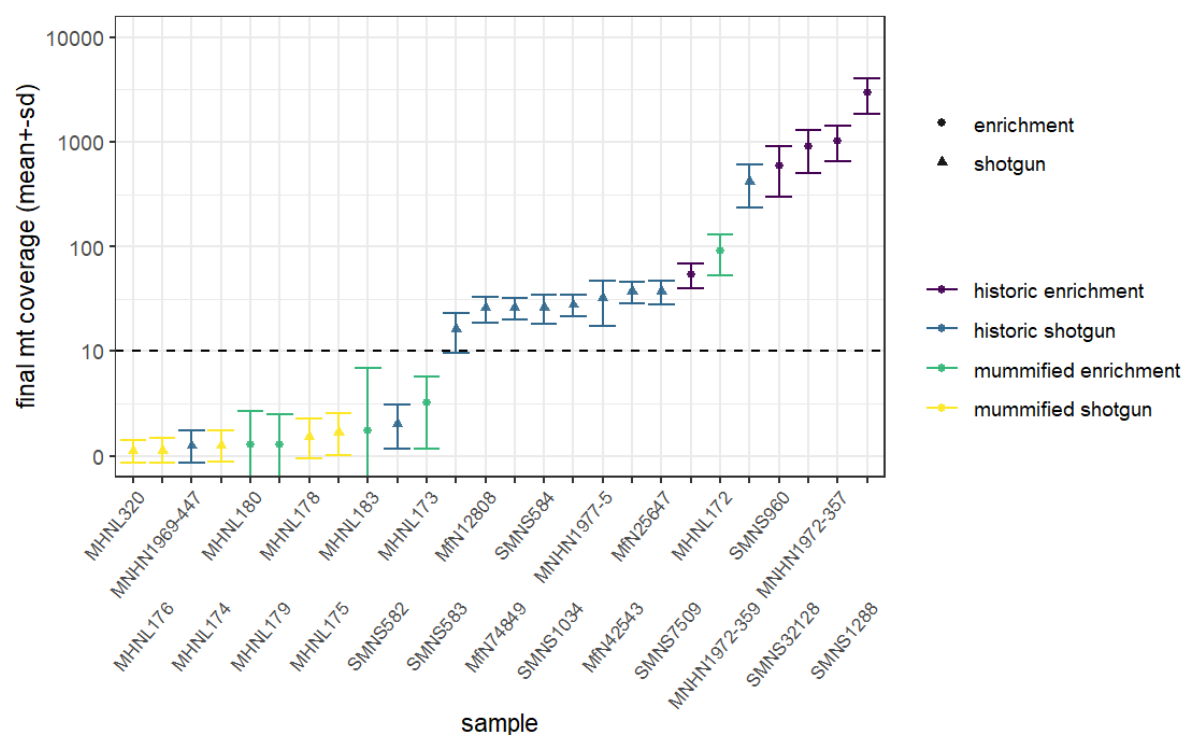

**Figure S2:** Overview of sequencing success for museum and mummy specimens. Mean (+/- sd) final coverage of the mitogenome is shown for each sample (with abbreviated museum ID). Circles and triangles depict the different sequencing approaches, enrichment and shotgun, respectively; colours represent the different sample types and sequencing approaches (yellow: shotgun sequencing of mummy sample, blue: shotgun sequencing of historic sample, purple: capture enrichment of historic sample, green: capture enrichment of mummy sample). Dashed line shows the cut-off limit 10X for mean final coverage, samples below were excluded from final analyses.



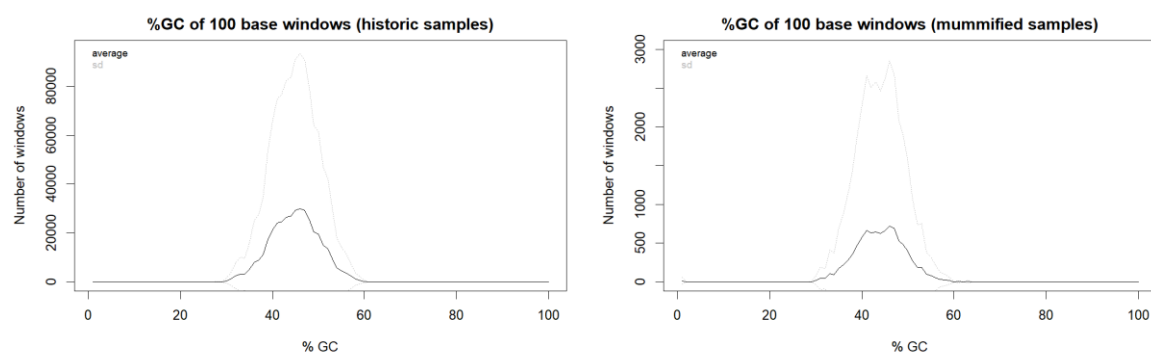

**Figure S3:** Distribution of GC content in historic samples and mummified samples.

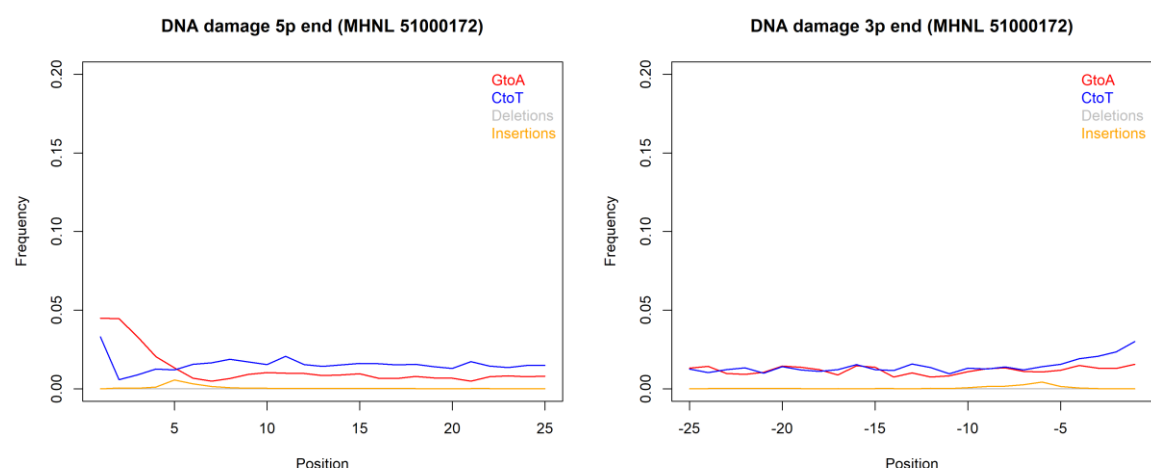

**Figure S4:** DNA damage plot for the sample of the mummified baboon MHNL 51000172 from 5' and 3' read ends, showing mean frequencies of C to T substitutions (blue), G to A substitutions (red), deletions (grey) and insertions (yellow) over the first/last 25 positions.

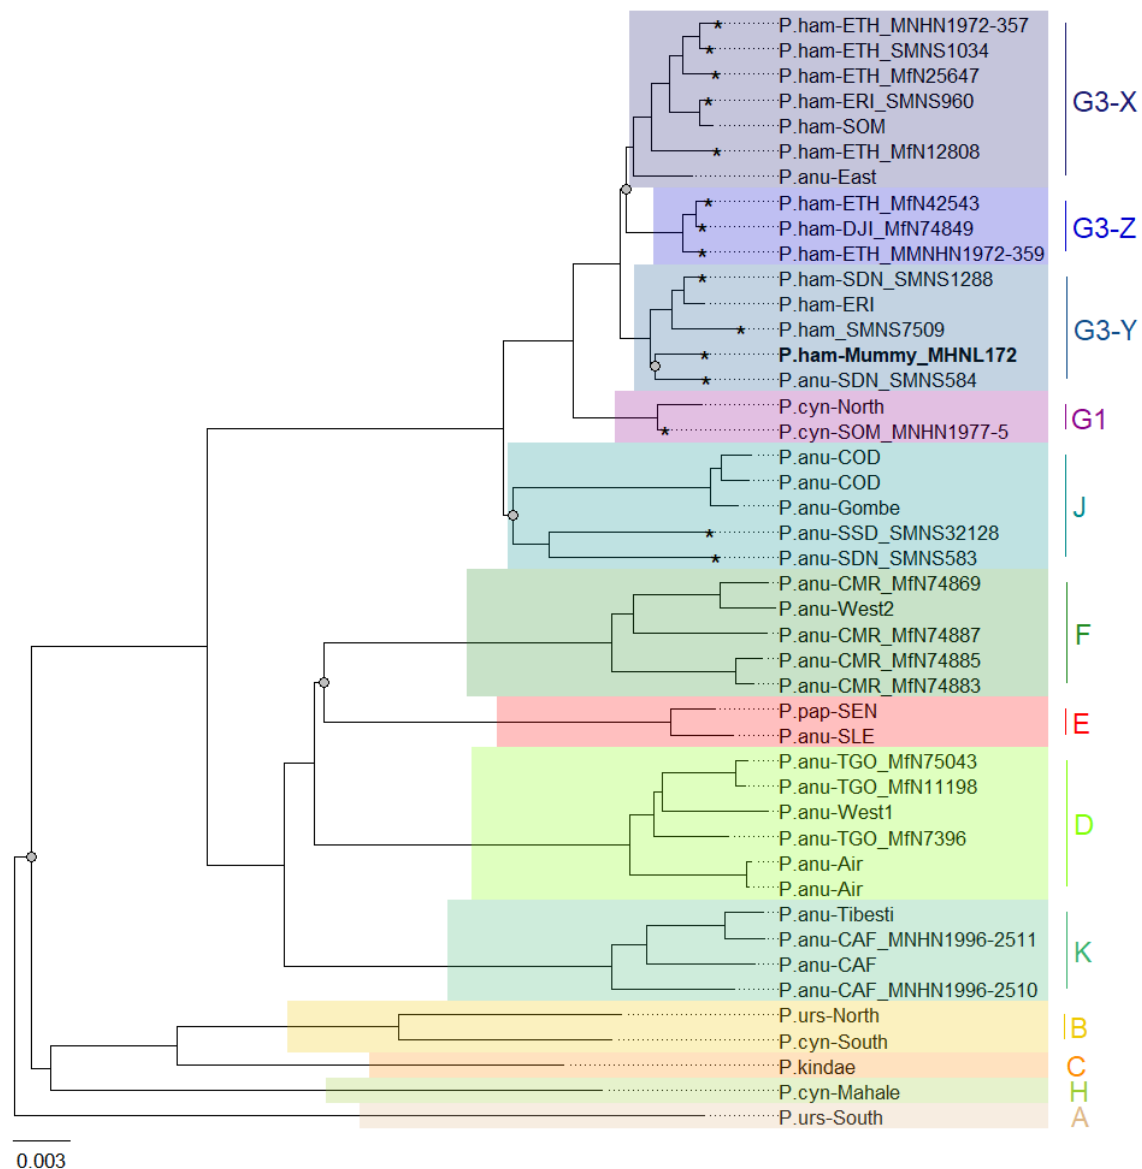

**Figure S5: Phylogeny of baboons based on complete mitochondrial genomes** under Bayesian inference. Outgroups (*T. gelada* and *P. cynocephalus-Udzungwa*) were omitted from visualization for clarity. The analysed baboon mummy sample MHNL 51000172 (in bold) falls into clade G3-Y. Clade names (A-K) according to Roos et al. (2020), subclades according to Kopp et al. (2014); sample IDs include putative species (P.ham - *P. hamadryas*, P.anu - *P. anubis*, P.cyn - *P. cynocephalus*, P.urs - *P. ursinus*, P.pap - *P. papio*), country of origin code (CAF - Central African Republic, CMR - Cameroon, COD - Democratic Republic of Congo, DJI - Djibouti, ERI - Eritrea, ETH - Ethiopia, NGA - Nigeria, SDN - Sudan, SSD - South Sudan, SEN - Senegal, SLE - Sierra Leone, SOM - Somalia, TGO - Togo; note that sample SMNS7509 is of unclear geoprovenance) and abbreviated museum code. Nodes with PP<95 are marked with a grey dot. Mitochondrial genomes generated in this study are marked with an asterisk.

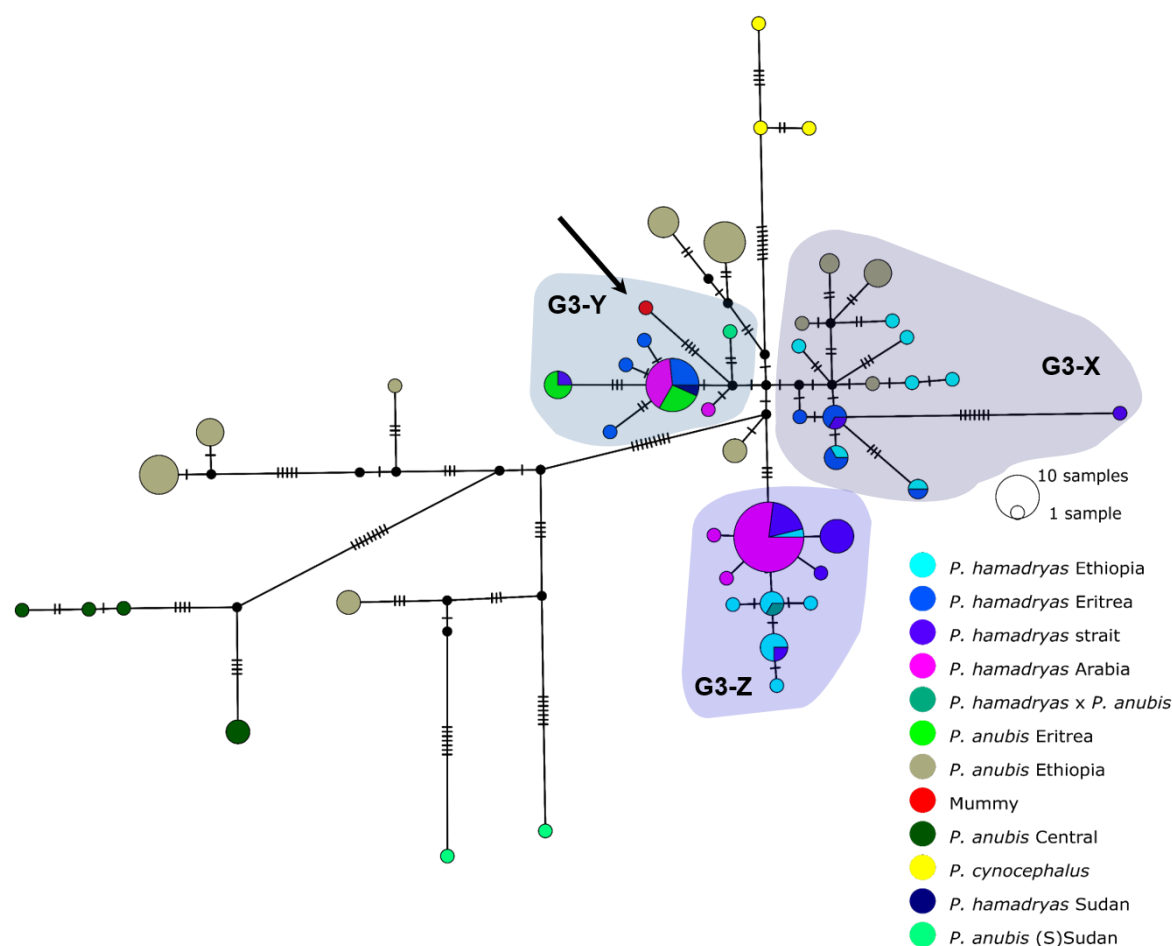

791

792 **Figure S6: Median joining haplotype network of north-eastern baboons** based on 137 cyt *b* sequences  
793 (1140bp). The analysed baboon mummy sample resolves in clade G3-Y (depicted in red, arrow). Circle colour  
794 reflects species and country of origin ("Arabia" comprises samples from Yemen and Saudi Arabia, "strait" comprises  
795 samples from near the Bab-el-Mandab Strait, i.e. southern Eritrea, Djibouti, northern Somalia).

796

797 **Table S1:** Overview of analysed samples and sequencing results. (provided as .csv)
